# Supplementary material for: Different Oncologic Outcomes According to Margin Status (High-Grade Dysplasia vs. Carcinoma) in Patients Who Underwent Hilar Resection for Mid-Bile Duct Cancer
Source: MDPI journal article supplement (doi:10.3390/cancers15215166), 2023-10-26
Supplement: s1 [file s1]

**Supplementary Table S1.** location of positive margin for R1 patients ( $n=25$ ).

| Location        | R1 HGD ( $n=9$ ) | R1 Carcinoma ( $n=14$ ) |
|-----------------|------------------|-------------------------|
| PROXIMAL MARGIN | 5 (55.6)         | 8 (57.1)                |
| DISTAL MARGIN   | 4 (44.4)         | 6 (42.9)                |
| BOTH            | 0                | 0                       |

HGD, High grade dysplasia.

**Supplementary Table S2.** Uni-and multivariate analysis identifying factors affecting disease free survival ( $n=149$ ).

| VARIABLE      | PATIENTS (N) | 5Y DFS (%)  | UNIVARIATE ANALYSIS |             |          | MULTIVARIATE ANALYSIS |             |          |
|---------------|--------------|-------------|---------------------|-------------|----------|-----------------------|-------------|----------|
|               |              |             | HR                  | 95% CI      | <i>P</i> | HR                    | 95% CI      | <i>P</i> |
| SEX           |              |             |                     |             |          |                       |             |          |
| MALE / FEMALE | 104 / 45     | 27.9 / 40.5 | 0.860               | 0.562-1.315 | 0.486    |                       |             |          |
| AGE           |              |             |                     |             |          |                       |             |          |
| ≤ 65 / > 65   | 56 / 93      | 44.9 / 23.9 | 1.540               | 1.010-2.348 | 0.045    | 1.302                 | 0.843-2.011 | 0.234    |
| BMI           |              |             |                     |             |          |                       |             |          |
| ≤ 25 / > 25   | 106 / 43     | 26.2 / 46.3 | 0.691               | 0.440-1.086 | 0.109    |                       |             |          |
| ASA SCORE     |              |             |                     |             |          |                       |             |          |
| I             | 18           | 9.4         |                     |             |          |                       |             |          |
| II            | 113          | 37.1        | 0.699               | 0.399-1.227 | 0.212    |                       |             |          |
| III/IV        | 18           | 18.9        | 1.038               | 0.501-2.154 | 0.919    |                       |             |          |
| PREOP CA19-9  |              |             |                     |             |          |                       |             |          |
| ≤ 35 / > 35   | 84 / 65      | 39.2 / 21.7 | 2.580               | 1.748-3.809 | <0.001   | 2.026                 | 1.327-3.094 | 0.001    |
| T-STAGE       |              |             |                     |             |          |                       |             |          |
| T1            | 47           | 56.8        |                     |             |          |                       |             |          |
| T2            | 91           | 21.2        | 2.617               | 1.621-4.226 | <0.001   | 1.778                 | 1.059-2.983 | 0.029    |
| T3/4          | 11           | 18.9        | 2.535               | 1.124-5.719 | 0.025    | 1.948                 | 0.824-4.606 | 0.129    |
| N STAGE       |              |             |                     |             |          |                       |             |          |
| N (-) / N (+) | 107 / 42     | 38.2 / 15.2 | 2.084               | 1.390-3.123 | <0.001   | 1.573                 | 1.029-2.405 | 0.036    |
| MARGIN        |              |             |                     |             |          |                       |             |          |
| R0            | 126          | 35.2        |                     |             |          |                       |             |          |
| R1 HGD        | 9            | 14.8        | 1.482               | 0.643-3.415 | 0.356    |                       |             |          |
| R1 CARCINOMA  | 14           | 9.8         | 1.458               | 0.794-2.675 | 0.224    |                       |             |          |
| COMPLICATIONS |              |             |                     |             |          |                       |             |          |
| NO / YES      | 133 / 16     | 34.2 / 13.5 | 1.503               | 0.832-2.715 | 0.177    |                       |             |          |
| CHEMOTHERAPY  |              |             |                     |             |          |                       |             |          |
| NO / YES      | 135 / 14     | 32.8 / 16.3 | 1.458               | 0.756-2.810 | 0.260    |                       |             |          |

DFS, Disease free survival; HGD, High grade dysplasia.
